# Supplementary material for: Knowledge, attitude, and practice toward hyperuricemia among healthcare workers in Shandong, China
Source: PeerJ. 2024 Oct 1;12:e17926. doi: 10.7717/peerj.17926 (PMC11451443; doi:10.7717/peerj.17926)
Supplement: Supplemental Information 8 [file peerj-12-17926-s008.xlsx]

## Sheet: Dataset
No	Age	Age-Group	Sex	Residency	Ethnicity	Education	Occupation	Job title	Department	Work experience (years)	Work experience (years)-Group	Hospital classification	Treated patients with hyperuricemia	K1	K2	K3	K4	K5	K6	K7	K8	K9	K10	K11	K12	K13	K14	K15	A1	A2	A3	A4	A5	A6	A7	A8	P1	P2	P3	P4	P5	P6	P7	P8	P9	P10	P11	Kscore	Ascore
1	49	3	1	1	1	3	1	3	2	27	3	3	1	1	1	1	1	1	1	1	1	1	1	1	1	1	1	2	5	4	5	4	5	2	5	5	4	5	5	5	5	5	5	5	5	5	5	14	35
2	39	2	1	1	1	2	1	1	7	12	2	2	1	1	1	1	1	1	1	1	1	0	1	1	1	1	1	2	5	2	5	4	5	1	5	5	1	3	4	4	5	5	5	5	4	5	5	13	32
3	28	1	2	1	1	2	2	1	7	5	1	2	1	1	1	1	0	0	1	1	0	1	1	1	1	1	1	3	5	4	5	1	5	1	5	5					5	5	5	5	5	5	5	11	31
4	37	2	1	1	1	3	1	2	7	10	2	2	1	1	1	1	1	1	1	1	0	1	1	1	1	1	1	2	5	2	4	1	5	1	5	5	2	3	4	3	5	5	5	5	5	5	4	13	28
5	34	2	2	1	1	2	2	2	7	8	1	2	2	1	1	1	1	1	0	1	0	0	1	1	1	1	1	3	4	4	4	4	4	2	4	4					4	4	4	5	5	4	3	11	30
6	48	3	1	1	1	2	1	3	7	27	3	2	1	1	1	0	0	1	1	0	0	0	1	0	1	0	1	2	4	3	4	4	5	3	4	4	4	5	3	4	5	4	4	4	4	5	3	7	31
8	47	3	2	1	1	2	2	3	7	26	3	2	1	1	1	0	0	1	1	1	0	1	0	1	1	1	0	2	5	5	5	5	5	1	5	5					4	5	5	4	5	4	1	9	36
9	26	1	2	2	1	1	2	1	7	1	1	2	2	1	1	0	0	1	1	1	0	0	0	1	1	1	1	1	5	4	4	4	5	2	4	4					4	4	4	4	3	4	4	9	32
12	33	2	2	1	1	2	2	2	7	10	2	2	2	1	1	1	1	1	1	0	0	0	1	1	1	1	1	2	5	4	4	3	4	2	4	4					5	5	4	5	5	4	1	11	30
13	30	2	2	1	1	2	2	1	7	6	1	2	2	1	1	1	1	0	1	1	0	1	1	1	1	1	1	3	5	5	4	3	5	1	5	5					5	4	5	4	4	4	4	12	33
17	40	2	1	1	1	2	1	2	2	16	2	2	1	1	1	1	1	1	1	0	0	1	1	1	1	0	0	2	5	5	5	2	5	2	3	4	3	4	4	3	5	4	4	4	4	4	4	10	31
18	48	3	1	1	1	3	1	3	11	26	3	2	1	1	1	1	1	1	0	1	0	1	1	0	1	1	1	2	5	3	5	3	5	2	4	4	3	4	4	2	5	4	3	5	4	5	3	11	31
19	33	2	2	1	1	2	1	1	7	11	2	2	1	1	1	1	1	1	0	0	0	1	1	1	1	1	1	2	5	4	4	4	4	1	4	4	3	4	4	4	5	5	4	5	4	4	3	11	30
20	27	1	2	1	1	3	1	1	3	1	1	2	2	1	1	1	1	1	1	1	0	1	1	1	1	1	1	2	5	5	5	5	5	1	5	5	4	4	5	5	5	5	5	5	5	5	5	13	36
21	28	1	1	1	1	2	1	1	7	2	1	2	1	1	1	1	1	1	1	1	0	0	1	1	1	0	1	2	5	4	5	2	5	1	5	5	3	5	5	3	5	5	5	5	5	5	3	11	32
25	48	3	1	1	1	2	1	3	6	21	3	2	1	1	1	1	1	1	1	1	0	1	1	1	1	1	1	2	5	5	5	5	5	1	5	5	4	5	5	5	5	5	5	5	5	5	2	13	36
26	40	2	2	1	1	2	1	2	9	10	2	2	1	1	0	1	1	0	0	1	0	1	1	1	1	0	1	3	5	3	4	3	4	2	4	4	4	4	4	3	5	4	3	4	4	4	4	9	29
30	37	2	2	1	2	2	1	2	3	12	2	2	1	1	1	1	1	0	1	1	0	1	1	0	1	0	0	2	5	5	5	2	5	1	5	5	3	4	5	5	5	5	5	5	4	4	4	9	33
31	40	2	2	1	1	1	2	2	9	20	2	5	2	1	1	1	0	0	1	0	0	1	1	1	1	1	0	3	5	5	4	3	4	1	5	5					4	5	5	5	5	5	3	9	32
34	33	2	2	1	1	2	1	2	1	11	2	2	1	1	1	1	1	1	1	1	0	1	1	1	1	1	1	2	5	4	5	2	5	2	5	5	3	4	5	5	5	5	5	5	5	5	4	13	33
36	50	3	2	1	1	2	1	3	11	27	3	3	1	1	1	1	1	1	0	1	0	0	1	1	1	1	0	2	4	4	4	3	5	2	5	5	3	4	5	5	5	5	5	4	5	3	3	10	32
38	39	2	2	2	1	2	2	2	3	15	2	3	2	1	0	1	1	1	0	0	0	0	0	0	0	1	1	3	4	4	5	2	3	4	2	3					3	3	2	2	5	4	4	6	27
39	32	2	1	1	1	2	1	2	3	6	1	3	1	1	1	1	1	1	1	0	0	1	1	1	1	1	1	3	5	5	5	4	5	1	5	5	4	4	4	4	5	5	5	4	5	5	4	12	35
40	46	3	1	1	1	2	1	2	10	24	3	3	1	1	1	1	1	1	1	1	0	1	1	1	1	1	1	2	5	3	5	1	5	1	5	5	5	5	5	5	5	5	5	5	5	4	3	13	30
42	28	1	2	2	1	2	2	1	10	6	1	5	1	1	1	1	1	1	0	0	0	1	1	0	1	1	1	2	5	4	5	5	5	1	5	5					5	5	5	4	4	5	4	10	35
44	42	3	1	1	1	2	1	2	11	20	2	3	1	1	1	0	0	1	1	1	0	1	1	1	1	1	1	3	5	4	4	3	5	1	5	5	4	4	3	3	5	4	4	4	4	5	4	11	32
46	26	1	2	2	1	2	2	1	10	5	1	3	2	1	1	1	1	1	0	1	0	0	1	0	1	1	1	2	4	3	4	2	5	1	2	4					5	3	4	5	4	5	3	10	25
49	38	2	1	2	1	2	1	3	11	14	2	3	1	1	1	1	1	1	1	1	0	1	1	1	1	1	1	2	5	5	5	4	5	1	5	4	4	4	5	5	5	5	4	5	4	5	4	13	34
50	27	1	1	2	1	1	2	1	11	7	1	5	2	1	1	1	1	1	0	1	0	0	1	0	1	1	1	1	5	5	5	4	5	1	5	5					5	5	5	5	5	5	5	10	35
51	46	3	2	1	1	2	2	3	11	27	3	3	1	1	1	0	1	1	1	1	1	1	0	1	1	1	1	2	5	5	5	4	5	1	4	5					5	5	5	5	5	5	5	12	34
53	35	2	1	2	1	2	2	2	11	12	2	5	2	1	1	0	0	0	1	1	0	1	1	0	1	1	1	2	4	3	4	2	3	2	5	5					4	5	4	4	4	4	2	9	28
54	21	1	1	2	1	1	1	4	11	1	1	5	2	1	1	1	1	1	1	0	0	1	1	1	1	1	1	2	5	5	5	1	5	1	5	5	3	3	3	3	3	4	4	4	4	4	4	12	32
56	39	2	1	1	1	2	1	2	11	18	2	3	1	1	1	1	1	1	1	1	0	1	1	1	1	1	1	2	5	5	5	4	5	1	5	5	4	4	4	3	5	4	4	4	4	4	4	13	35
57	38	2	1	1	1	2	1	3	6	14	2	3	1	1	1	1	1	1	1	1	0	0	0	0	1	1	1	2	4	4	4	2	4	1	4	4	4	4	4	4	5	4	4	4	5	4	4	10	27
59	30	2	2	1	1	2	2	1	10	5	1	3	2	1	1	1	0	0	0	1	0	1	0	0	1	1	0	3	4	4	5	3	4	2	4	4					4	4	4	4	4	4	4	7	30
60	29	1	2	1	1	2	1	1	10	5	1	5	2	1	1	1	1	1	1	1	1	1	0	1	1	1	0	2	5	4	4	3	5	1	5	5	3	4	5	3	5	4	4	5	5	5	2	12	32
62	40	2	2	1	1	2	1	3	11	17	2	3	1	1	1	0	1	0	1	1	0	1	1	0	0	1	1	2	5	4	4	4	4	2	4	4	5	4	5	5	5	5	5	5	5	5	4	9	31
63	42	3	1	1	1	3	1	3	11	20	2	3	1	1	1	1	1	1	1	1	0	0	1	1	1	1	1	3	5	3	4	1	5	1	4	4	3	4	4	4	5	5	5	4	4	4	3	12	27
68	39	2	1	2	1	2	1	3	11	18	2	3	2	1	1	1	1	1	1	1	0	1	1	1	1	1	1	2	3	3	4	3	5	1	3	4	3	3	3	3	3	3	3	2	3	4	4	13	26
71	33	2	2	1	1	2	2	1	9	10	2	3	1	1	1	1	1	1	0	1	0	0	1	0	1	1	1	1	5	4	4	4	5	1	4	4					4	3	3	4	3	4	3	10	31
72	39	2	2	1	1	2	2	2	7	19	2	3	2	1	1	0	0	1	0	1	0	0	1	0	0	0	1	2	4	2	4	2	4	2	4	4					2	3	4	2	4	3	1	6	26
76	49	3	2	2	1	2	2	2	11	20	2	1	2	1	1	1	1	1	1	1	0	1	1	1	1	0	1	2	5	4	4	4	5	1	5	5					5	5	4	5	5	5	4	12	33
77	38	2	1	1	1	2	1	2	1	15	2	5	2	1	1	1	1	1	1	1	0	1	1	1	1	1	1	2	4	4	4	3	4	2	4	4	4	4	4	4	4	4	4	4	4	4	4	13	29
79	35	2	1	2	1	2	1	2	11	10	2	3	2	0	1	0	1	0	0	0	0	0	0	1	1	1	1	2	4	4	4	4	4	2	4	4	3	3	4	3	3	3	3	3	3	3	3	6	30
83	41	3	1	2	1	2	1	3	6	19	2	3	1	1	1	1	1	1	1	1	0	1	1	1	1	1	1	2	5	4	5	4	5	1	5	5	4	5	5	5	5	5	5	5	5	5	3	13	34
85	51	3	1	2	1	2	3	3	11	31	3	3	2	1	1	0	1	0	0	1	0	0	0	0	1	0	0	3	4	3	4	3	4	2	4	4					3	3	4	3	3	3	3	5	28
90	32	2	1	1	1	2	1	1	11	6	1	5	2	1	1	1	1	1	0	1	0	0	1	0	1	1	1	2	4	5	5	3	5	1	5	5	3	4	4	4	5	5	5	5	5	5	5	10	33
91	51	3	1	1	1	3	1	3	3	24	3	2	1	1	1	1	1	1	1	0	0	1	1	1	1	1	1	2	5	5	5	4	5	1	5	5	5	5	5	5	5	5	5	5	5	5	5	12	35
93	41	3	2	1	1	2	1	3	9	18	2	5	1	1	1	1	1	1	1	1	0	1	1	1	1	0	1	2	5	5	5	4	5	1	5	5	4	5	5	1	5	5	5	5	5	5	2	12	35
98	35	2	1	1	1	2	1	2	11	12	2	3	2	1	1	1	1	1	1	1	0	1	1	1	1	1	1	2	4	4	4	3	4	2	4	4	3	3	3	3	3	3	3	3	3	3	3	13	29
100	50	3	2	1	1	2	2	3	8	31	3	5	1	1	1	1	1	1	1	1	0	1	1	1	1	1	1	2	5	4	5	4	5	1	5	5					5	5	5	5	5	5	5	13	34
103	36	2	1	2	1	2	1	2	3	17	2	3	1	1	1	1	0	1	1	1	0	1	1	1	1	1	1	2	5	3	4	2	4	2	4	4	4	4	4	4	4	4	4	4	4	4	4	12	28
107	46	3	2	1	1	1	2	2	9	22	3	3	2	1	1	0	1	1	1	1	0	1	1	0	1	1	1	3	5	3	4	3	5	1	4	5					4	4	4	4	2	2	2	11	30
108	42	3	1	2	1	2	1	3	7	20	2	3	1	1	1	1	1	1	1	1	0	1	1	1	1	1	1	2	5	5	5	1	5	1	5	5	2	4	4	4	4	4	5	4	5	5	3	13	32
109	46	3	2	2	1	1	2	2	3	24	3	1	2	1	1	1	1	1	1	1	0	0	1	1	1	1	1	3	5	5	5	1	5	1	5	5					4	4	5	4	5	5	4	12	32
111	48	3	2	2	1	2	1	2	11	26	3	1	1	1	1	1	1	1	1	1	0	1	1	1	1	1	1	2	5	5	5	3	5	1	5	5	5	4	5	4	5	5	5	5	5	5	2	13	34
112	35	2	2	1	1	2	2	2	1	12	2	3	1	1	1	0	1	1	1	1	0	1	1	1	1	1	0	3	5	5	5	1	5	1	5	5					5	5	5	5	5	5	2	11	32
113	50	3	1	2	1	3	1	3	10	26	3	3	1	1	1	1	1	1	0	1	0	0	1	0	1	1	1	3	5	3	5	3	5	1	5	5	3	5	5	5	5	5	4	4	4	5	3	10	32
114	49	3	1	2	1	2	1	2	11	5	1	5	1	1	1	1	1	1	1	1	0	1	1	1	1	1	1	2	5	4	5	2	5	1	5	5	3	4	5	4	5	5	5	5	4	5	1	13	32
118	35	2	2	1	1	2	1	2	3	12	2	3	1	1	1	1	1	1	1	1	0	1	1	1	1	1	0	2	5	4	5	2	5	1	5	5	3	5	5	5	5	5	5	5	5	5	5	12	32
120	43	3	2	1	1	2	1	2	11	21	3	1	1	1	1	1	1	1	1	1	0	1	1	1	1	1	1	2	5	5	5	4	5	1	5	5	3	5	5	5	5	5	5	5	5	5	4	13	35
121	30	2	1	1	1	2	1	1	11	1	1	2	2	1	1	1	1	1	0	1	0	1	1	1	1	1	1	2	4	4	5	4	4	1	5	5	4	5	4	4	4	5	4	5	5	5	3	12	32
122	41	3	2	1	1	2	1	1	11	20	2	1	2	0	0	0	0	0	0	0	0	0	0	0	0	0	0	3	5	5	5	1	5	1	5	5	3	5	4	4	5	5	5	5	5	5	4	0	32
124	51	3	2	2	1	2	1	2	11	27	3	5	1	1	1	1	1	1	0	1	0	1	1	1	1	1	1	2	4	4	4	4	4	2	4	4	2	3	3	4	5	4	4	4	4	4	4	12	30
126	40	2	2	2	1	2	1	2	11	15	2	3	2	1	1	1	1	1	0	0	0	1	1	0	1	1	1	2	4	4	5	2	5	1	4	4	3	5	4	5	5	3	4	4	5	5	2	10	29
127	49	3	2	2	1	2	2	3	10	30	3	3	1	1	1	1	1	1	1	1	0	1	1	1	1	1	1	2	4	4	5	2	5	1	5	5					4	4	4	4	4	4	4	13	31
129	47	3	1	2	1	2	1	3	11	24	3	3	1	1	1	1	1	1	1	1	0	1	1	1	1	1	1	2	5	5	5	4	5	2	5	5	5	5	5	5	5	5	5	5	5	5	5	13	36
130	22	1	2	2	1	1	2	4	10	1	1	5	2	1	1	1	1	1	0	1	0	0	1	1	1	1	1	2	5	5	5	3	5	1	5	5					4	4	4	4	4	4	4	11	34
131	48	3	1	1	1	3	1	3	5	24	3	2	2	1	1	1	1	1	1	1	0	1	1	1	1	1	1	2	5	5	5	4	5	1	5	5	5	5	5	5	5	5	5	5	5	5	5	13	35
132	40	2	2	1	1	2	3	2	11	20	2	5	2	1	1	1	0	1	1	1	0	1	1	0	1	1	1	3	5	3	5	5	5	1	5	5					5	5	5	5	5	5	2	11	34
133	42	3	2	1	2	2	1	3	5	21	3	3	1	1	1	1	1	1	1	1	1	1	1	1	1	1	1	2	5	5	5	2	5	1	5	5	4	5	5	5	5	5	5	5	5	5	5	14	33
134	38	2	1	2	1	2	2	2	11	18	2	3	2	1	1	1	1	1	0	0	0	1	1	1	1	1	1	3	5	4	4	3	4	2	4	4					4	4	5	5	5	5	4	11	30
136	52	3	1	1	1	2	1	3	8	27	3	3	1	1	1	1	1	1	1	1	0	1	1	1	1	0	1	2	5	5	5	5	5	1	5	5	5	5	5	5	5	5	5	5	5	5	5	12	36
138	22	1	1	1	1	1	1	4	2	1	1	3	2	1	1	0	0	1	0	0	0	0	0	0	0	0	0	3	4	4	4	2	4	2	4	4	3	3	3	3	3	3	3	3	3	3	3	3	28
139	39	2	2	2	1	2	2	2	3	15	2	3	2	1	1	1	1	1	0	0	0	0	0	0	1	1	0	1	5	4	4	3	5	2	4	4					4	4	5	4	5	4	5	7	31
140	45	3	1	1	1	2	1	1	5	20	2	5	1	1	1	1	1	1	1	1	0	1	1	1	1	1	1	2	5	5	5	1	5	1	5	5	2	4	5	5	4	4	5	4	4	3	3	13	32
142	30	2	1	1	1	2	1	1	11	6	1	3	1	1	1	1	1	1	1	1	0	1	1	1	1	1	1	2	5	5	5	4	5	1	5	5	4	5	5	5	5	5	5	5	5	5	4	13	35
144	42	3	1	1	1	2	1	3	10	18	2	3	1	1	1	1	1	1	1	1	0	1	1	1	1	1	1	2	5	5	5	1	5	1	5	5	5	5	5	5	5	5	5	5	5	5	5	13	32
145	44	3	2	1	1	2	1	2	3	19	2	3	1	1	1	1	1	0	1	1	0	1	1	1	1	1	1	3	5	5	5	3	5	3	4	5	4	2	5	5	4	4	5	5	5	5	3	12	35
147	52	3	2	2	1	2	2	3	5	31	3	5	2	1	1	0	1	0	1	1	0	0	1	1	1	0	1	2	5	4	5	4	5	1	5	5					5	5	5	5	5	5	5	9	34
150	22	1	2	2	1	1	2	4	11	1	1	3	2	0	0	0	0	0	0	0	0	0	0	0	0	0	0	3	4	3	3	3	3	3	3	3					5	5	5	5	5	5	5	0	25
152	51	3	1	2	1	2	1	2	3	27	3	2	1	1	1	1	1	1	1	1	0	1	1	1	1	1	1	2	4	3	4	4	5	2	4	4	4	4	5	4	4	4	5	4	4	4	1	13	30
153	52	3	2	2	1	1	2	2	10	30	3	3	1	1	1	1	1	1	1	1	0	1	1	1	1	1	1	3	5	4	5	4	5	1	5	5					5	5	5	5	5	5	1	13	34
157	24	1	2	2	1	2	1	4	11	1	1	5	2	1	1	1	1	1	0	1	0	0	1	1	1	1	1	1	4	4	4	2	4	2	4	4	4	4	4	4	4	4	4	4	4	4	4	11	28
158	47	3	1	1	1	2	1	2	5	27	3	3	1	1	1	1	1	1	1	1	1	1	1	1	1	1	0	2	5	5	5	3	5	1	5	4	4	3	4	4	4	4	3	4	4	5	4	13	33
161	45	3	2	2	1	2	2	3	6	26	3	3	2	1	1	0	1	1	0	1	0	0	1	0	1	1	1	3	5	5	5	4	5	1	5	5					5	5	4	4	4	3	4	9	35
162	54	3	2	2	1	2	2	3	5	33	3	3	2	1	1	1	0	1	1	1	0	1	1	1	1	1	1	3	5	5	5	2	5	1	5	5					5	5	5	5	5	5	4	12	33
165	48	3	2	2	1	2	1	2	11	26	3	1	1	1	1	1	1	1	1	1	0	0	1	0	1	0	0	2	4	4	4	2	4	2	4	4	3	5	5	4	5	4	4	4	4	4	4	9	28
167	50	3	2	2	1	2	1	3	10	27	3	3	1	1	1	1	1	0	1	1	0	1	1	1	1	1	1	3	4	4	5	3	5	1	5	5	5	5	5	5	5	5	5	4	4	5	3	12	32
168	44	3	1	2	1	2	1	3	6	22	3	3	1	1	1	1	1	1	1	1	0	1	1	1	1	1	1	2	5	5	5	4	5	1	5	5	4	5	5	5	5	5	5	5	5	5	5	13	35
169	25	1	2	1	1	2	2	1	10	4	1	5	2	1	1	1	0	1	0	1	0	1	1	0	1	1	1	3	5	3	4	3	5	1	5	5					5	5	5	5	5	5	4	10	31
173	35	2	2	2	1	2	2	2	11	10	2	3	2	1	1	1	1	1	1	1	0	1	1	1	1	1	1	2	4	4	4	4	5	1	5	4					4	5	5	5	5	5	5	13	31
176	31	2	2	1	1	2	2	1	11	9	1	3	2	1	1	1	1	1	1	0	0	0	1	1	1	1	1	1	5	5	5	1	5	1	5	5					5	5	5	5	5	5	5	11	32
177	38	2	1	2	1	2	1	2	6	12	2	3	1	1	1	1	1	1	1	1	0	1	1	1	1	1	1	2	5	5	5	4	5	1	5	5	4	4	5	5	5	5	5	5	5	5	3	13	35
178	46	3	1	2	1	2	1	2	6	26	3	1	2	1	0	1	1	1	0	1	0	0	0	0	1	1	1	2	5	5	5	3	5	1	5	5	3	5	5	5	5	5	5	5	5	5	4	8	34
179	32	2	2	1	1	2	1	1	11	5	1	5	2	1	1	1	1	1	1	1	0	1	1	1	1	1	1	2	5	5	5	3	5	1	5	5	3	3	4	4	5	5	3	5	5	5	2	13	34
180	53	3	1	2	1	2	1	3	11	32	3	3	1	1	1	1	1	1	1	1	0	1	1	1	1	1	1	2	5	5	5	2	4	1	4	4	4	5	5	5	5	5	5	5	5	5	5	13	30
182	41	3	1	1	1	2	1	2	11	20	2	3	1	1	1	1	1	1	1	1	0	1	1	1	1	1	1	3	5	5	4	3	5	1	5	5	5	5	5	5	5	5	5	5	5	5	4	13	33
183	51	3	2	1	1	2	2	3	3	31	3	3	1	1	1	1	1	1	1	1	0	0	1	0	1	0	0	3	5	4	5	4	5	2	4	4					5	5	4	5	4	4	3	9	33
186	46	3	2	2	1	2	2	3	11	26	3	3	1	1	1	1	1	1	1	1	0	1	1	1	1	1	1	2	4	5	5	3	5	1	5	5					5	5	5	4	4	4	3	13	33
188	30	2	2	2	1	2	2	1	11	5	1	5	2	0	1	1	0	0	0	0	0	1	1	0	1	1	0	2	4	2	5	2	4	1	4	4					4	4	5	4	4	5	4	6	26
189	34	2	1	2	1	2	1	1	11	9	1	3	1	1	1	1	1	1	1	0	0	1	1	1	1	1	1	2	5	5	5	3	5	1	5	5	5	4	5	5	5	5	5	5	5	5	5	12	34
190	43	3	2	2	1	2	1	3	11	20	2	3	2	1	1	0	1	1	1	1	0	1	1	1	1	1	1	2	5	3	5	3	5	1	5	5	4	5	5	5	5	5	5	5	5	5	5	12	32
191	34	2	2	1	1	2	1	1	11	9	1	3	1	1	0	1	1	1	1	0	0	1	1	1	1	1	1	2	5	3	4	4	5	1	5	5	3	4	3	3	4	4	5	5	4	5	4	11	32
193	44	3	1	1	1	2	3	3	11	26	3	3	2	1	1	1	1	1	1	1	0	1	1	0	1	0	1	3	5	4	5	4	4	2	4	4					4	4	4	4	4	4	4	11	32
194	54	3	1	2	1	2	1	3	11	33	3	3	2	1	1	1	1	1	1	1	0	0	1	1	1	1	0	2	5	5	5	3	5	1	5	5	3	3	3	3	4	5	5	5	5	5	4	11	34
195	37	2	2	1	1	2	1	2	11	12	2	3	2	1	1	1	1	1	1	1	0	1	1	1	1	1	0	3	5	5	5	5	5	2	5	5	4	4	4	4	4	4	5	4	4	4	1	12	37
196	28	1	2	1	1	2	1	1	10	3	1	2	1	1	1	1	1	1	1	1	0	1	1	1	1	1	1	2	5	5	5	1	5	1	5	5	4	5	5	4	5	5	5	5	5	5	4	13	32
197	33	2	2	2	1	2	1	2	1	13	2	2	2	1	1	1	1	1	1	1	0	1	1	1	1	1	1	2	5	5	5	4	5	1	5	5	5	5	5	5	5	5	5	5	5	5	5	13	35
199	25	1	1	1	1	2	1	1	1	1	1	2	1	1	1	1	1	1	1	0	0	1	1	1	1	1	1	2	5	5	5	4	5	2	5	5	4	3	4	3	5	5	4	4	4	4	2	12	36
200	39	2	2	1	1	2	2	2	3	12	2	3	1	1	1	1	1	1	1	1	0	1	1	0	1	1	1	2	5	5	5	4	5	1	5	5					5	5	5	5	5	5	5	12	35
202	25	1	2	2	1	2	2	1	3	2	1	2	1	1	1	1	1	0	0	1	0	1	1	0	1	1	1	2	4	5	3	4	5	1	4	4					4	5	4	5	5	1	4	10	30
203	36	2	2	1	1	3	1	3	10	10	2	3	1	1	0	1	1	1	1	1	1	0	1	1	1	1	1	2	5	5	5	1	5	1	5	5	2	4	5	5	5	5	5	5	5	5	3	12	32
204	32	2	1	1	1	2	2	1	7	10	2	3	1	1	1	1	0	1	1	0	0	0	1	1	1	1	1	2	5	2	4	3	4	1	5	5					5	5	5	5	5	5	3	10	29
205	46	3	2	1	1	2	1	3	5	22	3	3	1	1	1	1	1	1	1	1	0	1	1	1	1	1	1	2	5	5	5	2	5	1	5	5	4	5	5	5	5	5	5	5	4	5	5	13	33
207	28	1	2	1	1	2	2	1	3	6	1	2	2	1	1	1	1	1	1	1	0	0	0	0	1	1	1	1	5	5	5	1	5	1	5	5					5	5	5	5	5	5	5	10	32
208	48	3	2	1	1	2	2	2	3	28	3	2	2	1	1	1	1	1	1	1	0	0	1	1	1	1	1	2	5	3	4	3	5	1	5	5					4	4	4	4	3	3	3	12	31
210	27	1	2	1	1	3	1	1	3	1	1	2	1	1	1	1	1	1	1	1	0	1	1	1	1	1	1	3	5	3	5	3	5	1	5	5	3	4	5	4	5	5	5	5	5	5	3	13	32
221	23	1	2	2	1	2	2	1	3	3	1	2	2	1	1	1	1	0	0	1	0	0	1	0	1	1	1	1	5	4	4	2	5	1	5	5					4	4	5	5	4	5	5	9	31
222	43	3	2	1	1	3	1	3	3	20	2	2	1	1	1	1	1	1	1	1	0	1	1	0	1	1	1	2	5	5	5	3	5	1	5	5	4	5	5	5	5	5	5	5	5	5	5	12	34
223	51	3	2	2	1	2	2	2	3	32	3	2	2	1	1	1	1	0	0	1	0	0	0	0	1	1	1	1	5	5	5	5	5	1	5	5					4	4	4	3	3	3	3	8	36
230	34	2	1	1	1	3	1	2	11	6	1	3	2	1	1	0	1	1	0	1	0	0	1	0	1	1	1	2	5	4	5	3	5	1	5	5	4	4	5	5	5	5	5	5	5	5	5	9	33
231	50	3	1	1	1	3	1	3	7	26	3	3	2	1	1	1	0	1	0	1	0	0	0	0	1	0	1	2	5	5	5	1	5	1	5	5	3	4	5	5	5	5	5	5	5	5	2	7	32
232	51	3	1	1	1	3	1	3	2	28	3	3	2	1	1	1	1	1	0	1	0	1	0	0	1	1	0	3	4	3	3	3	4	2	4	4	3	3	3	3	3	3	3	3	2	3	3	9	27
234	50	3	1	1	1	3	1	3	10	26	3	3	1	1	1	1	1	1	1	1	0	1	1	1	1	0	1	2	5	3	4	2	5	1	5	5	4	5	5	4	5	4	5	5	5	5	5	12	30
235	51	3	2	1	1	3	1	3	3	30	3	3	1	1	1	1	1	0	1	1	0	1	1	0	1	1	0	2	5	3	4	3	5	1	5	5	4	4	5	4	5	5	5	4	3	5	3	10	31
236	31	2	1	1	1	3	1	2	3	4	1	3	1	1	1	1	1	1	1	0	0	1	1	1	1	1	1	2	5	3	4	4	5	1	5	5	3	5	5	4	5	4	4	4	4	5	3	12	32
237	54	3	1	1	1	3	1	3	2	30	3	3	1	1	1	0	1	1	0	1	1	1	0	0	1	1	1	3	5	5	5	4	5	1	5	5	4	4	4	5	5	4	5	4	3	4	3	10	35
239	48	3	1	1	1	2	1	3	3	25	3	3	1	1	1	1	1	1	1	1	0	1	1	1	1	1	1	2	5	5	5	4	5	1	5	5	4	4	5	4	5	5	5	5	5	5	5	13	35
240	30	2	2	1	1	2	2	4	2	4	1	3	1	1	1	1	1	1	1	1	0	0	1	1	1	1	1	2	5	5	5	5	5	1	5	5					3	5	5	5	5	5	5	12	36
242	34	2	2	1	1	2	2	2	2	12	2	3	1	1	1	1	1	1	1	1	0	1	1	1	1	1	1	2	5	3	4	3	4	1	5	5					5	5	5	5	5	5	1	13	30
243	46	3	2	1	1	2	2	2	2	24	3	3	2	1	1	1	1	1	1	1	1	1	0	0	1	1	0	2	5	4	4	3	5	1	5	5					4	5	5	5	5	5	5	11	32
246	32	2	1	1	1	3	1	2	2	5	1	3	2	1	1	1	1	1	1	1	0	1	1	1	1	1	1	2	5	5	5	1	5	1	5	5	4	4	4	4	5	5	5	5	5	5	5	13	32
247	35	2	1	2	1	3	1	2	2	10	2	3	1	1	1	1	1	1	1	1	0	1	1	1	1	1	1	2	5	5	5	3	5	1	5	5	4	5	5	5	5	4	4	5	4	5	1	13	34
248	57	3	1	1	1	3	1	3	6	34	3	3	1	1	1	0	1	0	1	1	0	0	1	1	0	0	1	2	4	3	3	2	4	2	4	5	5	4	1	3	4	4	4	4	3	4	1	8	27
252	36	2	2	1	1	3	1	2	11	7	1	3	1	1	1	1	1	1	1	1	0	1	1	1	1	1	1	2	5	4	5	5	5	1	5	5	3	4	5	4	5	5	5	5	5	5	5	13	35
253	34	2	2	1	1	2	2	2	2	12	2	3	2	1	1	1	1	1	1	0	0	1	1	0	1	1	0	2	4	3	4	2	4	2	4	4					4	4	4	4	4	4	1	10	27
254	39	2	2	1	1	2	2	2	2	18	2	3	2	1	1	1	1	1	1	0	0	1	1	1	1	1	1	2	5	4	4	4	4	2	4	4					4	4	4	3	3	4	3	12	31
257	47	3	2	1	1	2	1	3	9	23	3	3	1	1	1	0	1	1	1	1	0	1	1	1	1	1	1	2	5	5	5	4	5	2	5	5	4	4	5	4	5	5	5	5	5	5	3	12	36
258	33	2	2	1	1	2	2	1	2	8	1	3	1	1	1	1	1	0	0	0	0	1	1	0	1	1	0	2	5	3	5	1	5	1	4	4					4	4	5	4	3	3	3	8	28
259	58	3	1	1	1	2	1	3	9	36	3	3	1	1	1	1	1	1	1	1	0	1	1	1	1	1	1	2	5	5	5	4	5	1	5	5	4	4	5	4	5	5	4	5	5	5	5	13	35
260	38	2	1	1	1	3	1	2	2	10	2	3	1	1	1	1	1	1	1	1	0	1	1	1	1	1	1	2	5	4	5	3	5	1	5	5	4	4	4	4	4	4	4	4	4	4	4	13	33
261	27	1	1	1	1	3	1	1	2	1	1	3	1	1	1	1	1	1	1	1	0	1	1	0	1	1	1	2	5	5	5	1	5	1	5	5	5	5	5	5	5	5	5	5	5	5	5	12	32
262	55	3	1	1	1	3	1	3	11	31	3	3	1	1	0	1	1	1	1	1	0	0	1	1	1	0	0	2	4	4	5	4	5	1	4	4	3	4	4	4	5	5	4	4	4	4	4	9	31
264	30	2	2	1	1	2	2	1	2	10	2	3	2	1	1	1	0	1	0	1	0	0	1	0	1	1	1	3	5	3	5	4	5	1	5	5					5	5	5	5	5	5	5	9	33
265	26	1	2	1	1	2	2	1	2	5	1	3	2	1	1	1	1	1	1	0	0	1	1	1	1	1	1	2	5	5	5	4	5	1	5	5					5	5	5	5	5	5	5	12	35
266	51	3	2	1	1	3	2	3	8	30	3	3	2	1	0	1	1	1	0	1	0	1	1	1	1	1	1	2	5	4	4	2	5	1	5	5					5	4	5	5	4	4	2	11	31
267	48	3	2	1	1	2	2	2	8	26	3	3	1	1	1	1	1	1	1	1	0	1	1	1	1	1	1	2	5	4	5	4	5	1	5	5					5	4	5	3	3	1	1	13	34
268	45	3	2	1	1	2	2	1	8	23	3	3	1	1	0	0	0	0	1	0	1	0	0	0	1	1	1	2	5	5	5	1	5	1	5	5					5	5	5	5	5	5	5	6	32
270	45	3	2	1	1	2	2	2	8	24	3	3	1	1	1	1	1	1	1	1	0	1	1	1	1	1	1	2	4	4	5	2	5	1	4	4					5	5	4	4	4	4	4	13	29
271	26	1	2	1	1	2	2	1	8	5	1	3	2	1	1	1	1	1	0	1	0	1	1	1	1	1	1	2	5	4	4	4	5	1	5	5					5	5	5	5	5	5	5	12	33
272	36	2	2	1	1	2	2	2	8	14	2	3	2	1	1	0	0	1	0	1	0	1	0	0	1	1	0	2	5	5	5	2	5	1	5	4					5	5	5	5	5	5	4	7	32
274	41	3	2	1	1	3	2	2	11	17	2	3	1	1	1	1	1	1	0	1	0	1	1	0	1	1	1	2	5	5	5	3	5	1	5	5					3	3	3	3	3	3	3	11	34
276	28	1	1	1	1	2	2	1	8	5	1	3	2	1	1	1	1	1	1	0	0	1	0	0	0	0	0	3	5	5	4	2	4	2	4	4					4	4	4	4	4	4	4	7	30
277	31	2	2	1	1	2	2	2	8	8	1	3	2	1	1	0	1	1	1	1	0	1	1	1	1	1	1	2	5	5	5	4	5	1	4	4					4	4	4	4	4	3	3	12	33
278	37	2	1	1	1	2	2	1	8	16	2	3	2	1	1	1	1	1	0	1	0	0	1	1	1	1	1	1	5	5	5	5	5	1	5	5					5	5	5	5	5	5	5	11	36
279	33	2	2	1	1	2	2	2	8	8	1	3	1	1	1	1	1	1	1	1	0	1	1	0	1	1	1	2	5	5	5	4	5	1	5	5					4	5	5	5	5	4	4	12	35
282	50	3	1	1	1	3	1	3	6	30	3	3	1	1	1	1	1	1	1	1	0	1	1	1	1	1	1	2	5	5	5	2	5	1	5	5	3	4	5	4	5	5	5	5	5	5	5	13	33
284	40	2	2	1	1	2	2	2	8	10	2	3	2	1	0	0	0	0	0	0	0	0	0	0	0	0	0	3	4	4	4	3	4	3	4	4					4	4	4	4	4	4	4	1	30
285	30	2	2	1	1	2	2	1	8	8	1	3	1	1	1	1	0	1	0	1	0	0	0	0	0	1	1	3	4	4	4	4	4	2	4	4					4	4	4	4	4	4	4	7	30
287	43	3	2	1	1	2	1	3	5	18	2	3	2	1	1	0	1	1	1	1	0	1	1	0	1	1	1	2	5	5	5	2	5	1	4	4	3	3	4	4	5	4	4	4	5	4	3	11	31
288	39	2	2	1	1	3	1	2	3	10	2	3	1	1	1	1	1	1	1	1	0	1	1	1	1	1	1	2	5	5	5	1	5	1	5	5	4	4	4	4	5	5	5	5	5	5	5	13	32
290	39	2	2	1	1	3	1	3	11	10	2	1	1	1	1	1	1	1	1	1	0	1	1	1	1	1	1	2	5	5	5	4	5	1	5	5	2	4	5	5	5	5	5	5	5	5	5	13	35
292	40	2	2	1	1	3	1	2	11	17	2	2	1	1	1	1	1	1	1	1	0	1	1	1	1	1	1	2	4	5	4	3	5	2	4	5	3	3	4	3	5	5	4	4	4	5	3	13	32
293	41	3	2	1	1	2	1	2	11	18	2	2	2	1	1	1	1	1	1	1	0	0	0	0	1	1	1	3	5	5	5	1	5	1	5	5	4	3	4	4	4	4	4	5	5	5	3	10	32
294	42	3	2	1	1	3	1	3	1	15	2	3	2	1	1	1	1	1	0	0	0	1	1	0	1	1	0	2	5	5	4	4	4	1	5	5	3	4	4	4	5	4	3	5	5	4	2	9	33
296	39	2	2	1	1	3	3	3	11	14	2	1	1	1	1	1	1	1	1	1	0	1	1	1	1	1	1	2	5	4	5	4	5	1	5	5					5	5	5	5	5	5	3	13	34
298	38	2	2	1	1	3	1	2	11	10	2	3	2	1	1	1	1	1	1	1	1	0	1	1	1	1	1	1	5	2	5	2	5	1	5	5	3	3	3	5	5	5	5	5	5	5	5	13	30
299	48	3	1	1	1	2	1	3	5	27	3	3	2	1	1	1	1	1	1	1	0	0	0	1	1	0	1	2	4	3	4	2	5	1	5	5	2	4	5	5	5	5	5	5	5	5	3	10	29
300	47	3	2	2	1	2	1	3	5	25	3	2	1	1	1	1	1	1	1	1	0	0	1	1	1	1	1	3	5	1	5	1	5	1	5	5	3	4	5	5	5	5	5	5	5	5	3	12	28
301	48	3	1	1	1	2	1	3	5	24	3	3	1	1	1	0	1	1	1	1	0	0	0	0	1	0	0	2	4	4	4	4	4	2	4	4	4	5	4	4	5	5	5	5	4	5	2	7	30
302	38	2	1	1	1	3	1	2	11	12	2	3	1	1	1	1	1	1	1	1	0	1	1	1	1	1	1	2	5	5	5	4	5	1	5	5	4	5	4	3	4	4	4	4	4	5	4	13	35
303	47	3	2	2	1	2	1	3	5	25	3	3	2	1	1	1	1	1	1	1	0	1	1	1	1	1	1	2	5	4	5	4	5	1	5	5	4	5	5	4	5	5	5	5	5	5	3	13	34
304	30	2	1	1	1	2	1	1	11	7	1	1	2	1	1	1	1	0	0	1	0	0	1	1	0	0	0	1	5	5	5	3	3	3	3	3	4	4	4	4	4	4	3	4	4	4	4	7	30
307	36	2	2	1	1	3	1	2	11	10	2	3	2	1	1	0	1	1	0	0	0	0	1	0	1	0	0	3	5	5	5	4	5	1	4	5	3	5	5	5	5	5	5	5	5	5	3	6	34
308	46	3	2	1	1	2	1	3	5	25	3	4	2	1	1	1	1	0	0	1	0	0	1	0	1	1	0	2	5	2	2	1	5	1	5	5	2	2	4	4	5	5	4	3	4	5	1	8	26
309	41	3	2	1	1	3	1	3	11	20	2	3	2	1	1	1	1	1	0	1	0	1	1	0	1	1	1	3	4	4	4	3	4	2	4	4	3	4	4	4	4	3	3	4	4	3	3	11	29
311	48	3	2	2	1	2	1	2	5	25	3	2	2	1	1	1	1	1	0	1	1	1	1	1	1	1	0	2	5	5	5	2	5	1	5	5	4	4	4	4	5	4	5	5	5	4	3	12	33
312	49	3	2	2	1	2	1	3	5	25	3	2	2	1	1	1	1	1	1	1	0	1	0	1	1	1	1	2	5	4	4	4	4	2	5	5	5	4	5	5	5	5	5	5	5	5	4	12	33
313	47	3	2	2	1	2	1	2	5	25	3	2	2	1	1	1	0	1	0	1	0	0	1	0	0	1	1	2	5	5	4	3	4	2	4	4	3	3	4	3	4	4	4	4	5	5	4	8	31
314	48	3	2	1	1	2	1	3	5	25	3	3	2	1	1	1	1	0	1	1	0	1	1	1	1	1	1	2	5	2	5	1	5	1	5	5	5	5	5	5	5	5	5	5	5	5	5	12	29
315	47	3	2	1	1	2	1	3	5	24	3	2	1	1	1	1	1	1	1	1	0	1	1	1	1	1	1	3	5	5	5	4	5	1	5	5	4	5	5	5	5	5	5	5	5	5	5	13	35
316	44	3	1	1	1	3	1	3	9	18	2	3	1	1	1	1	1	1	1	1	0	0	1	0	1	1	1	3	5	5	5	3	5	1	5	5	4	5	5	5	5	5	5	5	5	5	1	11	34
317	34	2	1	1	1	3	1	2	3	8	1	3	1	1	1	1	1	1	0	1	0	1	1	0	1	1	1	2	5	5	5	4	5	1	5	5	5	4	5	5	5	5	5	4	4	4	3	11	35
318	57	3	2	1	1	3	1	3	11	35	3	3	2	1	1	1	1	1	0	1	0	1	0	1	1	1	0	3	4	4	4	4	4	2	4	4	4	3	4	4	4	4	4	4	4	4	3	10	30
319	46	3	2	2	1	2	1	3	5	25	3	2	1	1	1	1	1	1	1	0	0	1	1	0	1	1	1	2	5	5	5	2	5	1	5	5	4	4	5	5	5	5	5	5	5	5	5	11	33
323	50	3	1	1	1	3	1	3	2	26	3	3	1	1	1	1	1	1	1	1	0	1	0	1	1	1	1	2	5	4	5	4	5	1	5	5	4	4	5	4	5	5	4	5	5	5	4	12	34
325	32	2	2	1	1	3	1	2	2	11	2	3	1	1	1	1	1	1	1	1	0	1	1	1	1	1	1	2	4	4	5	3	5	1	5	5	4	4	5	5	5	5	5	5	5	5	5	13	32
326	43	3	1	1	1	2	1	2	6	20	2	3	2	1	1	0	1	1	1	0	0	1	0	1	1	1	1	2	5	3	4	3	5	1	2	5	5	5	5	5	5	5	5	5	5	5	1	10	28
327	50	3	1	1	1	3	1	3	11	26	3	3	2	1	1	1	1	1	1	1	0	0	1	1	1	0	1	3	5	5	5	1	5	1	5	5	5	5	5	5	5	5	5	5	5	5	5	11	32
328	38	2	2	1	1	2	2	2	2	14	2	3	2	1	1	1	1	1	0	1	0	0	0	0	1	1	1	3	5	3	5	3	5	2	4	5					4	5	5	3	4	3	2	9	32
329	29	1	1	1	1	3	1	1	6	5	1	3	2	0	1	1	0	0	1	1	1	0	0	0	0	0	0	2	5	5	4	2	4	2	5	5	4	3	3	3	3	4	3	4	3	5	3	5	32
330	48	3	1	1	1	3	1	3	4	27	3	3	2	1	1	1	1	1	1	1	0	0	1	0	1	0	0	2	4	4	4	4	4	2	4	4	3	4	4	2	4	3	4	4	3	3	3	9	30
333	33	2	2	1	1	2	2	1	4	11	2	3	2	0	0	1	0	0	0	0	0	0	0	0	0	0	0	2	4	4	4	4	4	2	4	4					5	5	4	5	5	3	3	1	30
334	42	3	1	1	1	3	1	2	4	14	2	3	1	1	1	1	1	1	1	1	0	1	1	1	1	1	1	2	5	5	5	5	5	1	5	5	3	4	3	4	4	5	5	5	4	5	3	13	36
335	40	2	1	1	1	3	1	2	4	13	2	3	2	1	1	1	1	1	0	1	0	1	1	0	1	1	1	2	5	3	5	4	5	1	4	5	4	5	5	4	5	4	5	4	4	5	3	11	32
336	31	2	2	1	1	2	2	1	4	7	1	3	1	1	1	1	1	1	1	1	0	1	1	1	1	1	1	2	5	5	5	3	5	1	5	5					5	5	5	5	5	5	5	13	34
338	34	2	2	1	1	2	2	2	4	10	2	3	1	1	1	0	1	1	0	0	0	1	1	0	1	1	1	2	5	4	5	4	5	1	5	5					5	5	5	4	4	5	2	9	34
340	42	3	2	1	1	2	2	2	11	23	3	3	2	1	1	1	1	1	0	1	0	1	0	0	1	1	1	2	4	5	5	3	5	1	4	5					4	5	4	4	4	4	4	10	32
343	45	3	2	1	1	2	2	1	11	25	3	1	2	1	1	0	1	0	0	1	0	1	1	0	1	0	0	2	5	4	5	3	5	1	5	5					3	4	5	5	5	5	3	7	33
345	45	3	2	1	1	2	2	2	11	25	3	3	2	1	1	1	1	1	0	0	0	0	1	0	1	1	0	3	5	5	5	3	5	1	4	4					4	4	4	4	4	4	2	8	32
346	42	3	2	1	1	2	2	2	11	20	2	3	2	1	1	1	1	1	0	1	0	0	1	0	1	1	1	2	4	4	4	3	4	2	4	4					5	5	5	5	4	4	3	10	29
347	32	2	2	1	1	2	2	1	11	10	2	3	2	0	1	0	1	0	1	1	0	0	1	1	0	0	0	3	3	3	3	3	2	1	3	5					3	4	5	5	3	3	1	6	23
349	48	3	2	1	1	2	2	2	11	28	3	3	2	1	1	1	1	1	0	1	0	1	1	0	1	1	1	2	5	4	5	1	5	1	5	5					5	5	5	5	5	5	5	11	31
350	46	3	2	1	1	2	2	2	11	22	3	3	2	1	1	1	1	1	1	1	0	0	0	0	1	1	1	2	4	4	4	4	5	1	5	5					4	4	2	4	3	4	3	10	32
351	33	2	2	1	1	2	3	4	11	7	1	3	2	1	1	1	1	1	1	0	0	1	1	1	1	1	1	2	5	5	5	4	5	1	5	5					5	5	5	5	5	5	5	12	35
352	34	2	2	1	1	2	2	2	4	10	2	3	2	1	1	1	1	1	0	1	0	0	1	0	1	1	1	1	5	4	4	4	5	1	4	4					5	5	4	5	5	5	5	10	31
353	50	3	1	2	1	3	1	3	10	26	3	3	1	1	1	1	1	1	0	1	1	1	1	0	1	1	1	2	5	3	5	3	5	1	5	5	3	5	5	5	5	5	5	5	3	5	3	12	32
354	36	2	2	2	1	2	1	2	9	12	2	3	1	1	1	1	1	1	1	1	0	1	1	1	1	0	1	3	4	4	4	4	4	2	4	4	4	4	5	5	5	5	4	4	4	5	4	12	30
358	28	1	1	1	1	2	1	1	10	5	1	3	2	1	1	1	1	1	1	1	0	0	1	1	1	1	1	3	5	3	4	2	4	2	4	4	3	4	4	4	4	4	4	4	4	3	3	12	28
360	50	3	2	2	1	2	1	3	10	27	3	3	1	1	1	1	1	1	1	1	0	1	1	1	1	1	0	2	5	4	5	2	5	1	5	5	3	5	5	5	5	5	5	4	4	5	3	12	32
363	35	2	2	2	1	2	2	2	9	14	2	3	1	1	1	1	1	1	1	0	0	1	1	1	1	1	1	2	5	4	4	4	5	2	5	5					4	4	4	4	4	4	4	12	34
365	26	1	2	2	1	2	1	4	9	1	1	3	1	1	1	1	1	1	1	1	0	1	1	1	1	1	1	3	4	4	5	4	5	2	5	5	3	4	5	3	5	5	4	4	4	5	1	13	34
369	23	1	2	2	1	1	2	1	10	0	1	3	2	1	1	1	1	0	1	1	0	1	1	1	1	1	1	2	5	5	5	1	5	1	5	5					5	5	5	5	5	5	5	12	32
370	33	2	2	1	1	2	2	1	9	10	2	3	1	1	1	1	1	0	0	1	1	0	1	0	1	1	1	1	4	4	5	5	5	1	4	5					3	3	3	5	3	5	3	10	33
371	21	1	2	2	1	1	2	4	10	1	1	3	2	1	1	1	0	0	1	1	0	1	1	1	1	1	1	2	4	4	4	3	5	2	5	5					5	5	4	5	5	5	4	11	32
[truncated: 8 more columns]
